# Supplementary material for: Production rate calibration for cosmogenic 10 Be in pyroxene by applying a rapid fusion method to 10 Be-saturated samples from the Transantarctic Mountains, Antarctica
Source: Copernicus journal article supplement (doi:10.5194/gchron-6-491-2024), 2024-08-15
Supplement: Supplementary file [file gchron-6-491-2024-supplement-title-page.pdf › gchron-6-491-2024-supplement-title-page.pdf]

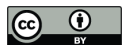

*Supplement of*

**Production rate calibration for cosmogenic  $^{10}\text{Be}$  in pyroxene by applying a rapid fusion method to  $^{10}\text{Be}$ -saturated samples from the Transantarctic Mountains, Antarctica**

**Marie Bergelin et al.**

*Correspondence to:* Marie Bergelin (mbergelin@bgc.org)

- gchron-6-491-2024-supplement-title-page.pdf
- input\_10Be\_exposure.txt
- input\_3He\_exposure.txt
- input\_P\_calibration.txt
- input\_P\_calibration\_all.txt

The copyright of individual parts of the supplement might differ from the article licence.
